# Supplementary material for: New spinel reference materials for oxygen isotopic microanalysis
Source: Royal Society of Chemistry journal article supplement (doi:10.1039/d5ja00344j), 2026-01-01
Supplement: d5ja00344j1.xlsx [file d5ja00344j1.xlsx]

## Sheet: TableS1-EPMA
Sample	Spot No.	Grain No.	Al2O3(wt.%)	FeO	MgO	Cr2O3	SiO2	MnO	TiO2	total		O	Al	Fe	Mg	Cr	Si	Mn	Ti	Cations based on 4 oxygens	Al	Fe	Mg	Cr	Si	Mn	Ti	Mg/(Mg+Fe)
MadSP	1	10	65.042	13.187	20.902	0.051	0	0.108	0.031	99.321		41.9521	34.434	10.2566	12.5412	0.0348947	0	0.083662	0.0186		1.94558	0.279409	0.797176	0.00102372	0	0.00232055	0.000591151	0.740468
	2	9	66.663	12.606	20.676	0.115	0	0.039	0.012	100.111		42.4925	35.2922	9.80467	12.4056	0.0786842	0	0.0302113	0.0072		1.99407	0.267098	0.788557	0.0023084	0	0.000837978	0.000228832	0.746983
	3	8	64.88	13.053	20.897	0.034	0.006	0.089	0.031	98.99		41.8376	34.3482	10.1523	12.5382	0.0232632	0.0028	0.0689437	0.0186		1.94074	0.276569	0.796985	0.000682483	0.000152555	0.00191231	0.000591151	0.74238
	4	7	64.962	13.787	20.963	0.073	0	0.07	0.041	99.896		42.0746	34.3916	10.7232	12.5778	0.0499474	0	0.0542254	0.0246		1.94319	0.292122	0.799503	0.00146533	0	0.00150406	0.000781844	0.732397
	5	6	66.457	11.714	20.857	0.089	0	0	0.006	99.123		42.2503	35.1831	9.11089	12.5142	0.0608947	0	0	0.0036		1.98791	0.248198	0.79546	0.0017865	0	0	0.000114416	0.762184
	6	5	65.586	13.236	20.938	0.051	0	0.05	0.002	99.863		42.2087	34.722	10.2947	12.5628	0.0348947	0	0.0387324	0.0012		1.96186	0.280447	0.798549	0.00102372	0	0.00107433	3.81387e-05	0.740085
	7	4	64.883	13.287	20.745	0.022	0	0.062	0.006	99.005		41.8072	34.3498	10.3343	12.447	0.0150526	0	0.0480282	0.0036		1.94083	0.281528	0.791188	0.000441607	0	0.00133217	0.000114416	0.737556
	8	3	66.008	12.117	20.896	0.057	0	0.027	0.012	99.117		42.1425	34.9454	9.42433	12.5376	0.039	0	0.0209155	0.0072		1.97448	0.256737	0.796947	0.00114416	0	0.000580139	0.000228832	0.756343
	9	2	65.098	12.862	21.102	0.018	0.042	0.043	0.055	99.22		41.9931	34.4636	10.0038	12.6612	0.0123158	0.0196	0.0333099	0.033		1.94726	0.272523	0.804804	0.000361314	0.00106788	0.000923925	0.00104882	0.747038
	10	1	65.399	13.929	21.495	0.049	0.025	0.046	0.02	100.963		42.5165	34.623	10.8337	12.897	0.0335263	0.0116667	0.0356338	0.012		1.95626	0.29513	0.819792	0.000983578	0.000635646	0.000988384	0.000381387	0.735291
	11	11	66.242	11.839	21.052	0.129	0	0.043	0.025	99.33		42.2848	35.0693	9.20811	12.6312	0.0882632	0	0.0333099	0.015		1.98148	0.250847	0.802897	0.00258942	0	0.000923925	0.000476734	0.761947
	12	12	65.465	13.265	21.12	0.033	0	0.058	0.045	99.986		42.2443	34.6579	10.3172	12.672	0.0225789	0	0.0449296	0.027		1.95824	0.281061	0.80549	0.00066241	0	0.00124622	0.000858122	0.741327
	13	13	65.4	12.867	21.411	0.048	0	0.023	0.012	99.761		42.2253	34.6235	10.0077	12.8466	0.0328421	0	0.0178169	0.0072		1.95629	0.272628	0.816589	0.000963505	0	0.000494192	0.000228832	0.749702
	14	20	64.904	13.333	20.785	0.06	0.004	0	0	99.086		41.841	34.3609	10.3701	12.471	0.0410526	0.00186667	0	0		1.94146	0.282502	0.792714	0.00120438	0.000101703	0	0	0.73726
	15	21	65.601	12.344	21.217	0.025	0.037	0.058	0.016	99.298		42.1481	34.7299	9.60089	12.7302	0.0171053	0.0172667	0.0449296	0.0096		1.96231	0.261547	0.80919	0.000501826	0.000940756	0.00124622	0.00030511	0.755732
	Mean		65.506	12.8951	21.0037	0.0569333	0.0076	0.0477333	0.0209333	99.538		42.1346	34.6796	10.0295	12.6022	0.0389544	0.00354667	0.0369765	0.01256		1.95946	0.273223	0.801056	0.00114282	0.000193236	0.00102563	0.000399186	0.745668
	1SD		0.591405	0.65889	0.233185	0.0326551	0.0145002	0.029244	0.0166238	0.549702		0.21948	0.313097	0.51247	0.139911	0.0223429	0.00676678	0.0226538	0.00997431		0.0176906	0.0139607	0.00889337	0.000655486	0.000368681	0.000628354	0.000317006	0.00956512
TanzSP-1	1	12	71.663	0.245	26.863	0.155	0	0	0	98.926		44.5724	37.9392	0.190556	16.1178	0.106053	0	0	0		2.14364	0.00519111	1.02452	0.00311132	0	0	0	0.994959
	2	11	71.319	0.233	26.594	0.174	0	0.004	0	98.324		44.3071	37.7571	0.181222	15.9564	0.119053	0	0.00309859	0		2.13335	0.00493685	1.01426	0.00349271	0	8.59465e-05	0	0.995156
	3	16	71.636	0.237	26.826	0.296	0.027	0	0	99.022		44.602	37.9249	0.184333	16.0956	0.202526	0.0126	0	0		2.14283	0.0050216	1.02311	0.00594162	0.000686497	0	0	0.995116
	4	17	71.214	0.241	26.836	0.279	0.006	0	0	98.576		44.3917	37.7015	0.187444	16.1016	0.190895	0.0028	0	0		2.13021	0.00510635	1.02349	0.00560037	0.000152555	0	0	0.995036
	5	10	71.293	0.249	26.726	0.276	0	0	0.025	98.569		44.3925	37.7434	0.193667	16.0356	0.188842	0	0	0.015		2.13257	0.00527586	1.0193	0.00554015	0	0	0.000476734	0.994851
	6	9	71.714	0.157	27.095	0.244	0	0.02	0	99.23		44.7022	37.9662	0.122111	16.257	0.166947	0	0.015493	0		2.14516	0.00332655	1.03337	0.00489782	0	0.000429732	0	0.996791
	7	8	71.913	0.161	26.83	0.127	0	0	0	99.031		44.6493	38.0716	0.125222	16.098	0.0868947	0	0	0		2.15111	0.0034113	1.02326	0.00254927	0	0	0	0.996677
	8	19	71.726	0.134	26.899	0.177	0	0.047	0	98.983		44.6093	37.9726	0.104222	16.1394	0.121105	0	0.0364085	0		2.14552	0.00283922	1.02589	0.00355293	0	0.00100987	0	0.99724
	9	20	71.333	0.088	26.897	0.227	0	0	0.017	98.562		44.4253	37.7645	0.0684444	16.1382	0.155316	0	0	0.0102		2.13377	0.00186456	1.02582	0.00455658	0	0	0.000324179	0.998186
	10	7	71.899	0.26	26.838	0.282	0.001	0	0	99.28		44.7174	38.0642	0.202222	16.1028	0.192947	0.000466667	0	0		2.1507	0.00550893	1.02357	0.00566059	2.54258e-05	0	0	0.994647
	11	21	71.596	0.291	26.859	0.196	0.034	0	0	98.976		44.5805	37.9038	0.226333	16.1154	0.134105	0.0158667	0	0		2.14163	0.00616576	1.02437	0.00393431	0.000864478	0	0	0.994017
	12	5	71.822	0.279	26.964	0.18	0	0	0	99.245		44.703	38.0234	0.217	16.1784	0.123158	0	0	0		2.14839	0.00591151	1.02837	0.00361314	0	0	0	0.994284
	13	22	71.9	0.18	26.923	0.224	0	0	0.019	99.246		44.7228	38.0647	0.14	16.1538	0.153263	0	0	0.0114		2.15073	0.00381387	1.02681	0.00449636	0	0	0.000362318	0.996299
	14	23	72.137	0.176	26.964	0.227	0	0.016	0.021	99.541		44.8552	38.1902	0.136889	16.1784	0.155316	0	0.0123944	0.0126		2.15782	0.00372912	1.02837	0.00455658	0	0.000343786	0.000400457	0.996387
	15	24	71.824	0.199	26.795	0.171	0.008	0	0.015	99.012		44.626	38.0245	0.154778	16.077	0.117	0.00373333	0	0.009		2.14845	0.00421645	1.02193	0.00343249	0.000203407	0	0.000286041	0.995891
	Mean		71.6659	0.208667	26.8606	0.215667	0.00506667	0.0058	0.00646667	98.9682		44.5905	37.9408	0.162296	16.1164	0.147561	0.00236444	0.00449296	0.00388		2.14372	0.00442127	1.02443	0.00432908	0.000128824	0.000124622	0.000123315	0.995703
	1SD		0.270929	0.057822	0.113318	0.0521408	0.0106936	0.0130285	0.00968701	0.332914		0.151366	0.143433	0.0449726	0.0679908	0.0356753	0.00499033	0.0100925	0.0058122		0.00810424	0.00122514	0.00432181	0.00104662	0.000271893	0.000279939	0.000184725	0.00119101
TanzSP-2	1	12	71.482	0.832	26.778	0.507	0	0	0	99.599		44.6948	37.8434	0.647111	16.0668	0.346895	0	0	0		2.13822	0.0176286	1.02128	0.010177	0	0	0	0.983032
	2	13	71.478	0.771	26.985	0.343	0	0.008	0.029	99.614		44.7238	37.8413	0.599667	16.191	0.234684	0	0.00619718	0.0174		2.1381	0.0163361	1.02917	0.00688505	0	0.000171893	0.000553012	0.984375
	3	14	72.02	0.943	26.983	0.346	0.002	0	0.021	100.315		45.0133	38.1282	0.733444	16.1898	0.236737	0.000933333	0	0.0126		2.15432	0.0199805	1.0291	0.00694527	5.08517e-05	0	0.000400457	0.980954
	4	11	71.711	0.84	26.831	0.34	0	0	0.002	99.724		44.7736	37.9646	0.653333	16.0986	0.232632	0	0	0.0012		2.14507	0.0177981	1.0233	0.00682483	0	0	3.81387e-05	0.982905
	5	10	71.599	0.745	26.651	0.387	0.006	0.035	0	99.423		44.6529	37.9054	0.579444	15.9906	0.264789	0.0028	0.0271127	0		2.14172	0.0157852	1.01644	0.00776826	0.000152555	0.000752032	0	0.984708
	6	15	71.367	0.779	26.933	0.464	0.027	0.043	0	99.613		44.7014	37.7825	0.605889	16.1598	0.317474	0.0126	0.0333099	0		2.13478	0.0165056	1.02719	0.00931388	0.000686497	0.000923925	0	0.984185
	7	16	71.729	0.916	26.885	0.376	0	0.016	0	99.922		44.8347	37.9742	0.712444	16.131	0.257263	0	0.0123944	0		2.14561	0.0194084	1.02536	0.00754746	0	0.000343786	0	0.981423
	8	9	72.129	0.867	27.01	0.395	0.008	0	0.002	100.411		45.0695	38.1859	0.674333	16.206	0.270263	0.00373333	0	0.0012		2.15758	0.0183702	1.03013	0.00792884	0.000203407	0	3.81387e-05	0.98248
	9	8	71.541	0.844	26.468	0.438	0.003	0.023	0	99.317		44.5862	37.8746	0.656444	15.8808	0.299684	0.0014	0.0178169	0		2.13999	0.0178828	1.00946	0.00879198	7.62775e-05	0.000494192	0	0.982593
	10	17	71.673	0.836	27.066	0.371	0	0	0.015	99.961		44.8638	37.9445	0.650222	16.2396	0.253842	0	0	0.009		2.14394	0.0177133	1.03226	0.00744709	0	0	0.000286041	0.98313
	11	18	71.745	0.837	26.985	0.551	0.009	0	0.021	100.148		44.9296	37.9826	0.651	16.191	0.377	0.0042	0	0.0126		2.14609	0.0177345	1.02917	0.0110602	0.000228832	0	0.000400457	0.98306
	12	6	71.9	0.83	27.182	0.483	0.002	0.016	0	100.413		45.0497	38.0647	0.645556	16.3092	0.330474	0.000933333	0.0123944	0		2.15073	0.0175862	1.03669	0.00969527	5.08517e-05	0.000343786	0	0.983319
	13	19	71.682	0.872	26.839	0.469	0	0.024	0.01	99.896		44.8196	37.9493	0.678222	16.1034	0.320895	0	0.0185915	0.006		2.14421	0.0184761	1.02361	0.00941425	0	0.000515679	0.000190694	0.98227
	14	20	71.867	0.852	26.879	0.341	0	0.023	0.019	99.981		44.8812	38.0472	0.662667	16.1274	0.233316	0	0.0178169	0.0114		2.14974	0.0180523	1.02513	0.0068449	0	0.000494192	0.000362318	0.982695
	15	5	71.945	0.909	26.964	0.381	0	0	0.042	100.241		44.9812	38.0885	0.707	16.1784	0.260684	0	0	0.0252		2.15207	0.0192601	1.02837	0.00764782	0	0	0.000800914	0.981616
	16	4	72.329	0.863	26.996	0.432	0.005	0.059	0.012	100.696		45.1845	38.2918	0.671222	16.1976	0.295579	0.00233333	0.0457042	0.0072		2.16356	0.0182854	1.02959	0.00867155	0.000127129	0.00126771	0.000228832	0.98255
	Mean		71.7623	0.846	26.9022	0.414	0.003875	0.0154375	0.0108125	99.9546		44.86	37.9918	0.658	16.1413	0.283263	0.00180833	0.0119586	0.0064875		2.14661	0.0179252	1.02602	0.00831023	9.85251e-05	0.0003317	0.000206188	0.982829
	1SD		0.257564	0.0520948	0.16882	0.0655978	0.0068884	0.0181695	0.0127918	0.393626		0.168781	0.136357	0.0405182	0.101292	0.0448827	0.00321458	0.0140749	0.00767506		0.00770445	0.00110379	0.00643856	0.00131675	0.000175143	0.0003904	0.000243931	0.00102433

## Sheet: TableS2-SIMS
Sample	Grain no.	Raw δ(‰)	1s				Sample	Grain no.	Raw δ(‰)	1s				Sample	Grain no.	Raw δ(‰)	1s					Sample	Raw δ(‰)	1s
MadSP@1	1	11.5032	0.0698309	2SD	0.373708		TanzSP-1@1	1	22.6673	0.0932777	2SD	0.399892		TanzSP-2@1	1	12.3628	0.0662802	2SD	0.333898			610@1	9.82626	0.0816992	2SD	0.351354
MadSP@2	1	11.48	0.0897113	MEAN	11.5122		TanzSP-1@2	2	22.4321	0.0952662	MEAN	22.7699		TanzSP-2@2	2	12.5495	0.105451	MEAN	12.7312			610@2	10.2097	0.0749143	MEAN	10.1261
MadSP@3	1	11.7861	0.0775157				TanzSP-1@3	3	22.8722	0.088995				TanzSP-2@3	3	12.6467	0.0775612					610@3	9.69589	0.113646
MadSP@4	1	11.3469	0.0729628				TanzSP-1@4	4	23.0313	0.0709803				TanzSP-2@4	3	12.6703	0.0941322					610@4	10.0229	0.0715101
MadSP@5	2	11.8477	0.0809654				TanzSP-1@5	5	22.9932	0.113773				TanzSP-2@5	4	13.092	0.09017					610@5	10.2611	0.0640524
MadSP@6	2	11.7142	0.0649795				TanzSP-1@6	6	23.115	0.134903				TanzSP-2@6	4	12.5918	0.0663631					610@6	10.1985	0.0640237
MadSP@7	2	11.7835	0.0964752				TanzSP-1@7	7	22.711	0.12696				TanzSP-2@7	5	12.7431	0.115827					610@7	10.193	0.0719187
MadSP@8	2	11.5289	0.0782179				TanzSP-1@8	8	22.8667	0.0774155				TanzSP-2@8	5	12.3558	0.085983					610@8	9.90647	0.0638966
MadSP@9	2	11.3804	0.0683707				TanzSP-1@9	9	22.6325	0.0743746				TanzSP-2@9	6	13.1093	0.0660335					610@9	9.95548	0.0662314
MadSP@10	3	11.648	0.0776714				TanzSP-1@10	10	22.8526	0.128348				TanzSP-2@10	6	12.7702	0.0664375					610@10	9.90169	0.0770016
MadSP@11	3	11.6863	0.0809793				TanzSP-1@11	11	22.8606	0.0784764				TanzSP-2@11	6	12.5816	0.0673965					610@11	10.3321	0.0639078
MadSP@12	4	11.5711	0.0940199				TanzSP-1@12	12	22.917	0.0837981				TanzSP-2@12	7	12.9497	0.067595					610@12	10.065	0.0906485
MadSP@13	4	11.8411	0.0714673				TanzSP-1@13	13	22.4799	0.0850108				TanzSP-2@13	8	12.8623	0.0743129					610@13	10.4696	0.104173
MadSP@14	4	11.6173	0.0751409				TanzSP-1@14	14	22.6435	0.0759702				TanzSP-2@14	9	12.7284	0.0910252					610@14	10.1226	0.0740189
MadSP@15	4	11.4713	0.119469				TanzSP-1@15	15	23.2184	0.0868187				TanzSP-2@15	10	12.8465	0.0815967					610@15	10.0601	0.0789769
MadSP@16	4	11.4671	0.071328				TanzSP-1@16	16	22.7264	0.0977325				TanzSP-2@16	11	12.5362	0.0771499					610@16	9.92528	0.0685927
MadSP@17	5	11.4769	0.0779972				TanzSP-1@17	17	22.3756	0.199862				TanzSP-2@17	12	12.5412	0.0807633					610@17	10.108	0.0646028
MadSP@18	5	11.7028	0.0810204				TanzSP-1@18	18	22.9441	0.0952546				TanzSP-2@18	13	12.7532	0.0795079					610@18	9.84521	0.0759289
MadSP@19	5	11.433	0.169523				TanzSP-1@19	19	22.8482	0.0913448				TanzSP-2@19	14	12.7282	0.0639329					610@19	10.2164	0.0699513
MadSP@20	6	11.5051	0.060783				TanzSP-1@20	20	22.6642	0.094426				TanzSP-2@20	15	12.6012	0.0988325					610@20	10.3538	0.0651046
MadSP@21	6	11.4289	0.0771528				TanzSP-1@21	21	22.2507	0.0836796				TanzSP-2@21	16	12.9368	0.0721482					610@21	10.5116	0.0654492
MadSP@22	6	11.7125	0.0826583				TanzSP-1@22	22	23.0619	0.102868				TanzSP-2@22	17	12.9264	0.0702625					610@22	10.1298	0.0642827
MadSP@23	6	11.4663	0.1377				TanzSP-1@23	23	22.3513	0.071799				TanzSP-2@23	18	12.6955	0.0807743					610@23	10.2506	0.0578946
MadSP@24	7	11.7488	0.0623563				TanzSP-1@24	24	22.8582	0.101835				TanzSP-2@24	19	12.9117	0.0634319					610@24	10.1014	0.058578
MadSP@25	7	11.6635	0.0628462				TanzSP-1@25	25	22.5447	0.0883636				TanzSP-2@25	20	12.7706	0.0639774					610@25	9.91136	0.0644765
MadSP@26	7	11.3069	0.0741715				TanzSP-1@26	26	22.7594	0.0920241				TanzSP-2@26	21	12.5907	0.0837701					610@26	10.0601	0.0858696
MadSP@27	8	11.3664	0.104996				TanzSP-1@27	27	22.7567	0.108754				TanzSP-2@27	22	12.6079	0.0744265					610@27	10.2609	0.0728867
MadSP@28	8	11.7986	0.075745				TanzSP-1@28	28	22.8181	0.077664				TanzSP-2@28	23	12.4581	0.081615					610@28	10.15	0.0725668
MadSP@29	8	11.4922	0.0898342				TanzSP-1@29	29	22.3767	0.0821944				TanzSP-2@29	24	13.0775	0.0898706					610@29	10.1375	0.0942007
MadSP@30	9	11.8109	0.0959158				TanzSP-1@30	30	22.4714	0.0912476				TanzSP-2@30	25	13.0295	0.0798424					610@30	9.90465	0.0690517
MadSP@31	9	11.5104	0.0727602				TanzSP-1@31	31	22.8979	0.0848209				TanzSP-2@31	26	12.5755	0.0842195					610@31	10.0033	0.0775333
MadSP@32	9	11.4906	0.0694625				TanzSP-1@32	31	22.6169	0.083293				TanzSP-2@32	27	12.6622	0.0795813					610@32	10.2418	0.0655069
MadSP@33	9	11.5885	0.0802923				TanzSP-1@33	31	22.6525	0.0878235				TanzSP-2@33	28	13.0809	0.0617266					610@33	10.1977	0.0735768
MadSP@34	9	11.428	0.114573				TanzSP-1@34	32	22.6123	0.0821975				TanzSP-2@34	29	12.8603	0.111188					610@34	10.3331	0.0784955
MadSP@35	10	11.6125	0.0770131				TanzSP-1@35	32	22.2816	0.0747872				TanzSP-2@35	30	12.9716	0.0820636					610@35	10.1809	0.0684817
MadSP@36	10	11.3547	0.0730589				TanzSP-1@36	32	22.8233	0.0673783				TanzSP-2@36	31	12.8671	0.0727126					610@36	10.505	0.0957568
MadSP@37	10	11.669	0.0630844				TanzSP-1@37	33	22.9134	0.074858				TanzSP-2@37	32	12.549	0.0822461					610@37	9.88226	0.0857596
MadSP@38	10	11.5535	0.081624				TanzSP-1@38	33	22.8642	0.0656763				TanzSP-2@38	33	12.8372	0.0636948					610@38	10.292	0.0756096
MadSP@39	11	11.2955	0.0820188				TanzSP-1@39	33	22.8314	0.0897899				TanzSP-2@39	34	13.0775	0.0785444					610@39	10.0563	0.076093
MadSP@40	12	11.6272	0.0654514				TanzSP-1@40	33	22.5798	0.0673191				TanzSP-2@40	35	12.5447	0.0903795					610@40	10.1918	0.0735142
MadSP@41	12	11.4444	0.0631464				TanzSP-1@41	34	23.0553	0.0770575				TanzSP-2@41	36	12.7751	0.0889122					610@41	10.3388	0.0870792
MadSP@42	12	11.4293	0.0624504				TanzSP-1@42	34	22.9862	0.108563				TanzSP-2@42	37	12.7031	0.076871					610@42	10.205	0.0874294
MadSP@43	12	11.7788	0.0812772				TanzSP-1@43	34	22.6386	0.0861023				TanzSP-2@43	38	12.6883	0.0795212					610@43	10.1155	0.0761766
MadSP@44	12	11.3107	0.0822441				TanzSP-1@44	35	22.7985	0.0657098				TanzSP-2@44	39	12.8863	0.0658001					610@44	10.1012	0.0833945
MadSP@45	13	11.2605	0.0657775				TanzSP-1@45	35	22.7327	0.077239				TanzSP-2@45	40	12.4377	0.0759169					610@45	10.0682	0.0921578
MadSP@46	14	11.3211	0.0708358				TanzSP-1@46	35	22.6939	0.0678632				TanzSP-2@46	41	12.738	0.0721207					610@46	10.2608	0.0664929
MadSP@47	15	11.5918	0.0749279				TanzSP-1@47	36	22.7703	0.0685895				TanzSP-2@47	42	12.4934	0.098197					610@47	9.93761	0.0805143
MadSP@48	16	11.252	0.0833435				TanzSP-1@48	36	22.8357	0.0904523				TanzSP-2@48	42	12.7612	0.0847814					610@48	10.1119	0.0799331
MadSP@49	17	11.1849	0.0876753				TanzSP-1@49	36	22.6689	0.0751868				TanzSP-2@49	43	12.9368	0.0856169					610@49	10.0618	0.0826065
MadSP@50	17	11.8926	0.0832974				TanzSP-1@50	36	22.6369	0.0974964				TanzSP-2@50	44	12.7414	0.089372					610@50	10.1307	0.0837366
MadSP@51	18	11.4096	0.0858601				TanzSP-1@51	37	22.663	0.0874903				TanzSP-2@51	45	12.8815	0.0901771
MadSP@52	18	11.3048	0.0621471				TanzSP-1@52	37	22.6899	0.10674				TanzSP-2@52	46	12.6847	0.0768271
MadSP@53	19	11.4884	0.0911828				TanzSP-1@53	38	22.8842	0.0641007				TanzSP-2@53	47	13.0069	0.080927
MadSP@54	20	11.4922	0.0898817				TanzSP-1@54	38	22.6721	0.0875621				TanzSP-2@54	48	12.8699	0.0904811
MadSP@55	20	11.3194	0.0867377				TanzSP-1@55	38	22.9077	0.0661148				TanzSP-2@55	49	12.6423	0.0673543
MadSP@56	20	11.7334	0.0604166				TanzSP-1@56	38	22.7771	0.078441				TanzSP-2@56	50	12.7109	0.0696218
MadSP@57	21	11.3012	0.0991384				TanzSP-1@57	39	22.9067	0.0758379				TanzSP-2@57	51	12.6622	0.0728354
MadSP@58	21	11.2996	0.0660547				TanzSP-1@58	39	22.5945	0.0734701				TanzSP-2@58	52	12.8408	0.0615876
MadSP@59	22	11.5057	0.120451				TanzSP-1@59	39	23.0346	0.0673817				TanzSP-2@59	53	12.6012	0.0633578
MadSP@60	22	11.0768	0.0756674				TanzSP-1@60	40	22.7968	0.0846094				TanzSP-2@60	54	13.0832	0.0728901
MadSP@61	22	11.4775	0.0862394				TanzSP-1@61	40	22.9584	0.0904346				TanzSP-2@61	55	12.9617	0.0615616
MadSP@62	23	11.2939	0.0804423				TanzSP-1@62	40	22.8336	0.0868699				TanzSP-2@62	56	12.7725	0.0851188
MadSP@63	24	11.3564	0.0727681				TanzSP-1@63	40	22.7135	0.0818236				TanzSP-2@63	56	12.8745	0.071466
MadSP@64	25	11.7096	0.0649117				TanzSP-1@64	41	22.3073	0.0665988				TanzSP-2@64	56	12.2706	0.0912496
MadSP@65	26	11.38	0.0667535				TanzSP-1@65	41	22.7571	0.0917319				TanzSP-2@65	57	12.6355	0.083366
MadSP@66	27	11.5914	0.0731115				TanzSP-1@66	41	22.8654	0.0801505				TanzSP-2@66	57	12.6748	0.0790774
MadSP@67	28	11.2263	0.0844349				TanzSP-1@67	42	22.6807	0.0819475				TanzSP-2@67	57	12.6091	0.0675144
MadSP@68	29	11.4325	0.0674684				TanzSP-1@68	42	22.9968	0.0723633				TanzSP-2@68	58	12.6514	0.0656619
MadSP@69	30	11.3756	0.0638145				TanzSP-1@69	42	22.7502	0.0756506				TanzSP-2@69	58	12.5936	0.0872182
MadSP@70	30	11.5443	0.0926267				TanzSP-1@70	43	22.8283	0.0642893				TanzSP-2@70	58	12.8429	0.0785805
MadSP@71	31	11.5068	0.0725673				TanzSP-1@71	43	22.5373	0.0786647				TanzSP-2@71	59	12.7858	0.0930288
MadSP@72	31	11.5705	0.0614008				TanzSP-1@72	43	22.6505	0.067386				TanzSP-2@72	59	12.6992	0.0934052
MadSP@73	32	11.3156	0.0898575				TanzSP-1@73	44	22.7317	0.0807484				TanzSP-2@73	59	12.7689	0.067004
MadSP@74	33	11.7105	0.0786616				TanzSP-1@74	44	22.6134	0.0654733				TanzSP-2@74	60	12.8024	0.0835459
MadSP@75	33	11.4409	0.0742342				TanzSP-1@75	44	22.5775	0.0724802				TanzSP-2@75	60	12.6802	0.0720184
MadSP@76	34	11.4593	0.0690319				TanzSP-1@76	45	22.9088	0.0724257				TanzSP-2@76	60	12.7746	0.0868269
MadSP@77	35	11.396	0.0877896				TanzSP-1@77	45	22.9206	0.0800107				TanzSP-2@77	60	12.5905	0.084454
MadSP@78	36	11.2264	0.0832163				TanzSP-1@78	45	22.6713	0.070174				TanzSP-2@78	61	12.7647	0.0738359
MadSP@79	37	11.482	0.0697622				TanzSP-1@79	46	23.1391	0.071654				TanzSP-2@79	62	12.7977	0.0874071
MadSP@80	38	11.2523	0.0616016				TanzSP-1@80	46	22.8145	0.0833268				TanzSP-2@80	62	12.7192	0.0760848
MadSP@81	39	11.686	0.0609061				TanzSP-1@81	46	22.782	0.0811823				TanzSP-2@81	63	12.6846	0.0768899
MadSP@82	39	11.5038	0.107295				TanzSP-1@82	46	22.8404	0.0935572				TanzSP-2@82	63	12.7435	0.0827228
MadSP@83	39	11.5429	0.086164				TanzSP-1@83	46	22.4777	0.236988				TanzSP-2@83	64	12.7234	0.0901524
MadSP@84	40	11.0621	0.0625675				TanzSP-1@84	47	22.9598	0.0898984				TanzSP-2@84	64	12.7503	0.0770852
MadSP@85	41	11.7093	0.0627408				TanzSP-1@85	47	22.78	0.109587				TanzSP-2@85	65	12.739	0.0953014
MadSP@86	41	11.6278	0.0666852				TanzSP-1@86	47	22.778	0.0887603				TanzSP-2@86	65	12.5004	0.101202
MadSP@87	41	11.8217	0.0635114				TanzSP-1@87	48	22.8031	0.0869667				TanzSP-2@87	65	12.6535	0.0953715
MadSP@88	42	11.6416	0.0814664				TanzSP-1@88	48	22.6301	0.103428				TanzSP-2@88	66	12.8947	0.0854984
MadSP@89	42	11.6233	0.0663576				TanzSP-1@89	48	22.7984	0.0826413				TanzSP-2@89	67	12.6447	0.0892423
MadSP@90	43	11.5737	0.0625967				TanzSP-1@90	49	22.8174	0.0920112				TanzSP-2@90	68	12.7964	0.0957776
MadSP@91	43	11.8325	0.0722479				TanzSP-1@91	49	22.9617	0.0951803				TanzSP-2@91	68	12.7744	0.0724503
MadSP@92	43	11.8025	0.0851674				TanzSP-1@92	49	22.7115	0.06644				TanzSP-2@92	68	12.5751	0.0669415
MadSP@93	44	11.327	0.0839183				TanzSP-1@93	50	22.8755	0.0803494				TanzSP-2@93	69	12.7083	0.0657873
MadSP@94	45	11.1642	0.0610404				TanzSP-1@94	51	23.1922	0.0845829				TanzSP-2@94	70	12.8599	0.0934223
MadSP@95	46	11.5215	0.0688887				TanzSP-1@95	51	22.4042	0.113252				TanzSP-2@95	70	12.662	0.0911259
MadSP@96	46	11.2277	0.0806585				TanzSP-1@96	52	22.7916	0.0729256				TanzSP-2@96	70	12.7347	0.075887
MadSP@97	47	11.4856	0.130821				TanzSP-1@97	52	22.7104	0.0769966				TanzSP-2@97	71	12.5849	0.111966
MadSP@98	47	11.5664	0.0845607				TanzSP-1@98	52	22.9205	0.0877251				TanzSP-2@98	71	12.39	0.0663247
MadSP@99	47	11.8646	0.102595				TanzSP-1@99	53	23.143	0.0653245				TanzSP-2@99	72	12.7002	0.0660452
MadSP@100	47	11.6318	0.112029				TanzSP-1@100	53	22.5763	0.0808283				TanzSP-2@100	72	12.6416	0.078644
MadSP@101	47	11.59	0.0912227				TanzSP-1@101	53	22.8648	0.0674174				TanzSP-2@101	73	12.5602	0.091378
MadSP@102	48	11.3126	0.0605463				TanzSP-1@102	54	22.594	0.0704484				TanzSP-2@102	73	12.7823	0.124032
MadSP@103	48	11.6941	0.0864006				TanzSP-1@103	55	23.0092	0.0761305				TanzSP-2@103	74	12.7894	0.0907748
MadSP@104	48	11.5942	0.077306				TanzSP-1@104	55	23.1019	0.0762142				TanzSP-2@104	75	12.6208	0.0717767
MadSP@105	48	11.3581	0.122764				TanzSP-1@105	55	23.0468	0.0780126				TanzSP-2@105	76	12.8061	0.0661121
							TanzSP-1@106	56	22.8656	0.081209				TanzSP-2@106	76	12.7215	0.0796141

## Sheet: TableS3-IRMS
Sample	No.	δ18O (‰)	Average	2SD
MadSP	1	11.59	11.942	0.428812
	2	11.94
	3	12.01
	4	12.17
	5	12
TanzSP-1	1	23.46	23.3975	0.198242
	2	23.27
	3	23.37
	4	23.49
TanzSP-2	1	13.39	13.2867	0.475591
	2	12.95
	3	13.26
	4	13.36
	5	13.12
	6	13.64
